# Supplementary material for: Long-Term Iron and Vitamin B12 Deficiency Are Present after Bariatric Surgery, despite the Widespread Use of Supplements
Source: MDPI journal article supplement (doi:10.3390/ijerph18094541), 2021-04-25
Supplement: s1 [file s1]

**Table S1.** Nutritional characteristics of the supplements used.

|              | Generic<br>Bariatric supplement | RYGB specific<br>supplement | SG<br>specific<br>supplement | Multivitamin<br>supplement | Vitamin D 3<br>(Cholecalciferol) | Calcium<br>carbonate  | Generic vitamin B<br>supplement | Iron<br>(ferrous<br>sulphate) |
|--------------|---------------------------------|-----------------------------|------------------------------|----------------------------|----------------------------------|-----------------------|---------------------------------|-------------------------------|
|              | Bariatric ©                     | WLS “Strong” ©              | WLS “Optimum”<br>©           | Multicentrum<br>“Adults” © | DIBASE ©                         | Natecal ©             | Be-Total Plus ©                 | Ferrograd ©                   |
| Iron         | 30 mg                           | 70 mg                       | 28 mg                        | 5 mg                       |                                  |                       |                                 | 105 mg                        |
|              | VNR%<br>214                     | VNR%<br>500                 | VNR%<br>200                  | VNR%<br>36                 |                                  |                       |                                 | VNR%<br>750                   |
| Vitamin D3   | 25 mcg<br>1.000 IU              | 75 mcg<br>3.000 IU          | 75 mcg<br>3.000 IU           | 10 mcg<br>400 IU           | 625 mcg<br>25.000 IU             |                       |                                 |                               |
|              | VNR%<br>250                     | VNR%<br>750                 | VNR%<br>750                  | VNR%<br>100                | VNR%<br>6250                     |                       |                                 |                               |
| Vitamin B12  | 33 mcg                          | 350 mcg                     | 100 mcg                      | 2.5 mcg                    |                                  |                       | 1.5 mcg                         |                               |
|              | VNR%<br>1320                    | VNR%<br>14000               | VNR%<br>4000                 | VNR%<br>100                |                                  |                       | VNR%<br>60                      |                               |
| Calcium      |                                 |                             |                              | 162 mg                     |                                  | 600 mg                |                                 |                               |
|              |                                 |                             |                              | VNR%<br>20                 |                                  | VNR%<br>75            |                                 |                               |
| Amount taken | one tablet per day              | one tablet per day          | one tablet per day           | one tablet per day         | *                                | one tablet per<br>day | one tablet per day              | one tablet per day            |

NRV: ‘Nutrient Reference Value’ - EU Food Information for Consumers Regulation 1169/2011. \* Vitamin D deficient was treated with at least 25,000 IU of Cholecalciferol twice a week to achieve a blood level of 25(OH)D above 30 ng/mL followed by maintenance therapy of 25,000 IU of vitamin D3 once a week.

**Table S2.** Percent weight loss (%WL) in patients undergoing AGB, SG and RYGB procedures.

| Time after surgery<br>(months) | Surgery (n) | Mean (%WL) | Std. Deviation | 95% Confidence Interval of the Mean |             | AGB vs SG vs<br>RYGB | SG vs RYGB |
|--------------------------------|-------------|------------|----------------|-------------------------------------|-------------|----------------------|------------|
|                                |             |            |                | Lower Bound                         | Upper Bound | <i>p</i> *           | <i>p</i> # |
| T3                             | AGB (11)    | 15.080     | 13.3662        | 5.518                               | 24.642      | 0.904                | 0.323      |
|                                | SG (25)     | 14.404     | 7.0153         | 11.442                              | 17.366      |                      |            |
|                                | RYGB (16)   | 15.967     | 11.5310        | 8.640                               | 23.293      |                      |            |
|                                | Total       | 14.959     | 9.6864         | 12.082                              | 17.835      |                      |            |
| T6                             | AGB (11)    | 20.775     | 13.9859        | 9.083                               | 32.467      | 0.850                | 0.123      |
|                                | SG (24)     | 22.989     | 7.1876         | 19.525                              | 26.454      |                      |            |
|                                | RYGB (15)   | 23.583     | 14.0307        | 14.669                              | 32.498      |                      |            |
|                                | Total       | 22.718     | 10.8885        | 19.188                              | 26.248      |                      |            |
| T12                            | AGB (10)    | 29.529     | 21.6162        | 9.537                               | 49.520      | 0.017                | 0.211      |
|                                | SG (22)     | 45.652     | 18.9848        | 37.011                              | 54.294      |                      |            |
|                                | RYGB (16)   | 54.208     | 30.2528        | 34.987                              | 73.430      |                      |            |
|                                | Total       | 45.398     | 24.1657        | 37.669                              | 53.126      |                      |            |
| T24                            | AGB (11)    | 20.817     | 17.0762        | 2.896                               | 38.737      | 0.048                | 0.166      |
|                                | SG (23)     | 33.520     | 10.0871        | 28.799                              | 38.241      |                      |            |
|                                | RYGB (16)   | 37.518     | 15.1987        | 27.308                              | 47.729      |                      |            |
|                                | Total       | 32.649     | 13.7611        | 28.060                              | 37.237      |                      |            |
| T36                            | AGB (10)    | 17.600     | 14.0489        | 7.550                               | 27.650      | 0.001                | 0.293      |
|                                | SG (24)     | 32.548     | 10.0986        | 28.380                              | 36.716      |                      |            |
|                                | RYGB (16)   | 36.560     | 13.7326        | 28.955                              | 44.165      |                      |            |
|                                | Total       | 30.762     | 13.6878        | 26.872                              | 34.652      |                      |            |
| T48                            | AGB (10)    | 18.486     | 14.2470        | 5.309                               | 31.662      | 0.011                | 0.955      |
|                                | SG (23)     | 34.513     | 10.3611        | 28.776                              | 40.251      |                      |            |
|                                | RYGB (15)   | 34.325     | 11.5746        | 26.971                              | 41.679      |                      |            |
|                                | Total       | 31.147     | 13.0359        | 26.599                              | 35.695      |                      |            |
| T60                            | AGB (11)    | 20.030     | 15.1703        | 9.178                               | 30.882      | 0.011                | 0.891      |
|                                | SG (24)     | 32.340     | 11.3465        | 27.656                              | 37.024      |                      |            |
|                                | RYGB (14)   | 35.129     | 11.4821        | 28.499                              | 41.758      |                      |            |
|                                | Total       | 30.624     | 13.1933        | 26.835                              | 34.414      |                      |            |

|     |           |        |         |        |        |          |       |
|-----|-----------|--------|---------|--------|--------|----------|-------|
| T72 | AGB (11)  | 18.770 | 15.8698 | 7.417  | 30.123 | 0.013    | 0.914 |
|     | SG (24)   | 32.283 | 11.6406 | 27.249 | 37.316 |          |       |
|     | RYGB (15) | 33.664 | 11.9931 | 26.740 | 40.589 |          |       |
|     | Total     | 29.819 | 13.7406 | 25.785 | 33.854 |          |       |
| T84 | AGB (10)  | 15.356 | 14.5924 | 4.139  | 26.572 | 0.005    | 0.553 |
|     | SG (25)   | 32.068 | 11.9913 | 26.752 | 37.385 |          |       |
|     | RYGB (15) | 33.092 | 13.5547 | 24.479 | 41.704 |          |       |
|     | Total     | 28.856 | 14.4970 | 24.394 | 33.317 |          |       |
| T96 | AGB (11)  | 11.845 | 14.3637 | 2.196  | 21.495 | 0.000006 | 0.407 |
|     | SG (25)   | 31.496 | 11.3162 | 26.825 | 36.167 |          |       |
|     | RYGB (16) | 34.994 | 14.2068 | 27.423 | 42.564 |          |       |
|     | Total     | 28.415 | 15.4119 | 24.125 | 32.706 |          |       |

AGB: Laparoscopic Adjustable Gastric Banding SG: Sleeve Gastrectomy. RYGB: Roux-en-y Gastric Bypass. The ANOVA test was performed to compare the % weight loss (%WL) of the three different surgeries over the 8 years (\*), with Bonferroni procedure as post-hoc analysis to compare SG and RYGB (#)

**Table S3.** Number of supplements taken by patients according to gender and surgery.

|   |         |      |                      | Number of Supplements Used |        |        |        |        | Total  |
|---|---------|------|----------------------|----------------------------|--------|--------|--------|--------|--------|
|   |         |      |                      | 0                          | 1      | 2      | 3      | 4      |        |
| F | Surgery | AGB  | Count                | 2                          | 3      | 2      | 2      | 0      | 9      |
|   |         |      | % within Surgery     | 22.2%                      | 33.3%  | 22.2%  | 22.2%  | 0.0%   | 100.0% |
|   |         |      | % within Supplements | 25.0%                      | 21.4%  | 18.2%  | 25.0%  | 0.0%   | 21.4%  |
|   |         |      | % of Total           | 4.8%                       | 7.1%   | 4.8%   | 4.8%   | 0.0%   | 21.4%  |
|   |         | SG   | Count                | 5                          | 3      | 5      | 4      | 0      | 17     |
|   |         |      | % within Surgery     | 29.4%                      | 17.6%  | 29.4%  | 23.5%  | 0.0%   | 100.0% |
|   |         |      | % within Supplements | 62.5%                      | 21.4%  | 45.5%  | 50.0%  | 0.0%   | 40.5%  |
|   |         |      | % of Total           | 11.9%                      | 7.1%   | 11.9%  | 9.5%   | 0.0%   | 40.5%  |
|   |         | RYGB | Count                | 1                          | 8      | 4      | 2      | 1      | 16     |
|   |         |      | % within Surgery     | 6.3%                       | 50.0%  | 25.0%  | 12.5%  | 6.3%   | 100.0% |
|   |         |      | % within Supplements | 12.5%                      | 57.1%  | 36.4%  | 25.0%  | 100.0% | 38.1%  |
|   |         |      | % of Total           | 2.4%                       | 19.0%  | 9.5%   | 4.8%   | 2.4%   | 38.1%  |
|   | Total   |      | Count                | 8                          | 14     | 11     | 8      | 1      | 42     |
|   |         |      | % within Surgery     | 19.0%                      | 33.3%  | 26.2%  | 19.0%  | 2.4%   | 100.0% |
|   |         |      | % within Supplements | 100.0%                     | 100.0% | 100.0% | 100.0% | 100.0% | 100.0% |
|   |         |      | % of Total           | 19.0%                      | 33.3%  | 26.2%  | 19.0%  | 2.4%   | 100.0% |
| M | Surgery | AGB  | Count                | 1                          | 1      | 0      | 0      | 0      | 2      |

|       |         |                      |        |        |        |        |        |        |
|-------|---------|----------------------|--------|--------|--------|--------|--------|--------|
| Total |         | % within Surgery     | 50.0%  | 50.0%  | 0.0%   | 0.0%   | 0.0%   | 100.0% |
|       |         | % within Supplements | 25.0%  | 50.0%  | 0.0%   | 0.0%   | 0.0%   | 20.0%  |
|       |         | % of Total           | 10.0%  | 10.0%  | 0.0%   | 0.0%   | 0.0%   | 20.0%  |
|       |         | Count                | 3      | 1      | 2      | 1      | 1      | 8      |
|       | SG      | % within Surgery     | 37.5%  | 12.5%  | 25.0%  | 12.5%  | 12.5%  | 100.0% |
|       |         | % within Supplements | 75.0%  | 50.0%  | 100.0% | 100.0% | 100.0% | 80.0%  |
|       |         | % of Total           | 30.0%  | 10.0%  | 20.0%  | 10.0%  | 10.0%  | 80.0%  |
|       | Total   | Count                | 4      | 2      | 2      | 1      | 1      | 10     |
|       |         | % within Surgery     | 40.0%  | 20.0%  | 20.0%  | 10.0%  | 10.0%  | 100.0% |
|       |         | % within Supplements | 100.0% | 100.0% | 100.0% | 100.0% | 100.0% | 100.0% |
|       |         | % of Total           | 40.0%  | 20.0%  | 20.0%  | 10.0%  | 10.0%  | 100.0% |
|       | AGB     | Count                | 3      | 4      | 2      | 2      | 0      | 11     |
|       |         | % within Surgery     | 27.3%  | 36.4%  | 18.2%  | 18.2%  | 0.0%   | 100.0% |
|       |         | % within Supplements | 25.0%  | 25.0%  | 15.4%  | 22.2%  | 0.0%   | 21.2%  |
|       |         | % of Total           | 5.8%   | 7.7%   | 3.8%   | 3.8%   | 0.0%   | 21.2%  |
|       | Surgery | Count                | 8      | 4      | 7      | 5      | 1      | 25     |
|       |         | % within Surgery     | 32.0%  | 16.0%  | 28.0%  | 20.0%  | 4.0%   | 100.0% |
|       |         | % within Supplements | 66.7%  | 25.0%  | 53.8%  | 55.6%  | 50.0%  | 48.1%  |
|       |         | % of Total           | 15.4%  | 7.7%   | 13.5%  | 9.6%   | 1.9%   | 48.1%  |
| Total | RYGB    | Count                | 1      | 8      | 4      | 2      | 1      | 16     |
|       |         | % within Surgery     | 6.3%   | 50.0%  | 25.0%  | 12.5%  | 6.3%   | 100.0% |
|       |         | % within Supplements | 8.3%   | 50.0%  | 30.8%  | 22.2%  | 50.0%  | 30.8%  |
|       |         | % of Total           | 1.9%   | 15.4%  | 7.7%   | 3.8%   | 1.9%   | 30.8%  |
|       | Total   | Count                | 12     | 16     | 13     | 9      | 2      | 52     |
|       |         | % within Surgery     | 23.1%  | 30.8%  | 25.0%  | 17.3%  | 3.8%   | 100.0% |
|       |         | % within Supplements | 100.0% | 100.0% | 100.0% | 100.0% | 100.0% | 100.0% |
|       |         | % of Total           | 23.1%  | 30.8%  | 25.0%  | 17.3%  | 3.8%   | 100.0% |

AGB: Laparoscopic Adjustable Gastric Banding. SG: Sleeve Gastrectomy. RYGB: Roux-en-y Gastric Bypass. Patients were considered to take the specified supplement if they reported taking that supplement at least 5 days per week. Pearson Chi-Square Test  $p - F = 0.503$ ;  $M = 0.701$ ; Total = 0.434
